# Supplementary material for: Single-nucleotide polymorphisms are associated with cognitive decline at Alzheimer's disease conversion within mild cognitive impairment patients
Source: PubMed Central journal article supplement — Alzheimers Dement (Amst). 2017 Apr 23;8:86–95. doi: 10.1016/j.dadm.2017.04.004 (PMC5440281; doi:10.1016/j.dadm.2017.04.004), 2017-04-23
Supplement: mmc1.pdf [file mmc1.pdf]

## Supplementary material

**Table 1 Study subject characteristics**

We summarized demographic information at the baseline of the 242 white MCI-AD converters. For continuous variables including age and the length of education, their means and standard deviations were presented. For a binary variable, gender, the percentage of male subjects was shown.

|                             | Mean $\pm$ SD or percentage |
|-----------------------------|-----------------------------|
| Age (in years)              | 74.21 $\pm$ 7.16            |
| Education length (in years) | 15.82 $\pm$ 2.83            |
| Gender (male percentage)    | 63.22%                      |

**Table 2 SNPs showing significant association with accelerated cognitive decline at p-value <  $1 \times 10^{-5}$**

ADAS-cog score trajectory was fitted in the linear mixed-effects models with fixed effects including gender, length of education, age at the baseline, follow-up time trajectory, AD diagnosis trajectory, and each SNP. We included a random intercept and a random slope of the AD diagnosis. An interaction effect of each SNP and the AD diagnosis trajectory was tested and the significant SNPs were shown.

| SNP         | Chr | Position  | P-value               | Gene    |
|-------------|-----|-----------|-----------------------|---------|
| rs17090219  | 18  | 54191033  | $9.48 \times 10^{-8}$ |         |
| rs3936289   | 3   | 186754957 | $4.92 \times 10^{-7}$ | ST6GAL1 |
| rs56378310  | 13  | 111189673 | $1.52 \times 10^{-6}$ | RAB20   |
| rs192470679 | 13  | 33290859  | $1.55 \times 10^{-6}$ | PDS5B   |
| rs11121365  | 1   | 9357724   | $1.92 \times 10^{-6}$ | SPSB1   |
| rs2484      | 3   | 197268569 | $2.83 \times 10^{-6}$ | BDH1    |
| rs10903488  | 10  | 1605998   | $3.24 \times 10^{-6}$ | ADARB2  |
| rs6016505   | 20  | 39678289  | $3.72 \times 10^{-6}$ | TOP1    |
| rs314277    | 6   | 105407662 | $4.51 \times 10^{-6}$ | LIN28B  |
| rs57905270  | 2   | 228486714 | $4.99 \times 10^{-6}$ | C2orf83 |
| rs12525341  | 6   | 155494724 | $8.07 \times 10^{-6}$ | TIAM2   |

**Table 3 Sensitivity analyses results for top meaningful SNPs**

We compared estimation and test results for the top meaningful SNPs as varying model specification. Two reduced models were considered: all covariates (1) without the length of education and (2) without the length of education and gender. We also ran a full model on a subsample including subjects whose baseline ages were greater than 60.

|             |         | Primary analysis |      |                       | Reduced model without EDU |      |                       | Reduced model without EDU and Gender |      |                       | Full model on a subsample (AGE>60) |      |                       |
|-------------|---------|------------------|------|-----------------------|---------------------------|------|-----------------------|--------------------------------------|------|-----------------------|------------------------------------|------|-----------------------|
| SNP         | Gene    | Coef             | SE   | P-value               | Coef                      | SE   | P-value               | Coef                                 | SE   | P-value               | Coef                               | SE   | P-value               |
| rs17090219  |         | 5.15             | 0.93 | $9.48 \times 10^{-8}$ | 5.13                      | 0.93 | $1.10 \times 10^{-7}$ | 5.13                                 | 0.93 | $1.10 \times 10^{-7}$ | 5.20                               | 0.95 | $1.53 \times 10^{-7}$ |
| rs3936289   | ST6GAL1 | 3.34             | 0.64 | $4.92 \times 10^{-7}$ | 3.33                      | 0.64 | $5.17 \times 10^{-7}$ | 3.34                                 | 0.64 | $4.95 \times 10^{-7}$ | 3.32                               | 0.67 | $1.35 \times 10^{-6}$ |
| rs56378310  | RAB20   | -2.98            | 0.6  | $1.52 \times 10^{-6}$ | -2.98                     | 0.60 | $1.53 \times 10^{-6}$ | -2.98                                | 0.60 | $1.50 \times 10^{-6}$ | -2.85                              | 0.61 | $6.18 \times 10^{-6}$ |
| rs192470679 | PDS5B   | 2.89             | 0.59 | $1.55 \times 10^{-6}$ | 2.88                      | 0.98 | $1.69 \times 10^{-6}$ | 2.89                                 | 0.59 | $1.67 \times 10^{-6}$ | 2.74                               | 0.62 | $1.41 \times 10^{-5}$ |
| rs11121365  | SPSB1   | 5.76             | 1.18 | $1.92 \times 10^{-6}$ | 5.77                      | 1.18 | $1.88 \times 10^{-6}$ | 5.73                                 | 1.18 | $2.21 \times 10^{-6}$ | 5.78                               | 1.21 | $3.25 \times 10^{-6}$ |
| rs2484      | BDH1    | 4.53             | 0.94 | $2.83 \times 10^{-6}$ | 4.52                      | 0.94 | $3.01 \times 10^{-6}$ | 4.49                                 | 0.94 | $3.47 \times 10^{-6}$ | 4.72                               | 0.95 | $1.35 \times 10^{-6}$ |
| rs10903488  | ADARB2  | 4.58             | 0.96 | $3.24 \times 10^{-6}$ | 4.56                      | 0.96 | $3.53 \times 10^{-6}$ | 4.56                                 | 0.96 | $3.61 \times 10^{-6}$ | 4.55                               | 0.98 | $5.78 \times 10^{-6}$ |

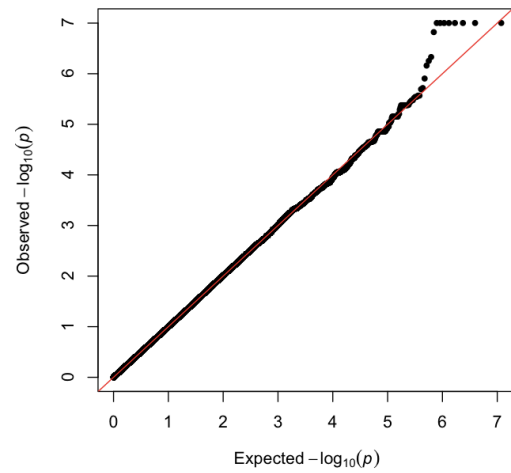

**Figure 1** The quantile-quantile (QQ) plot shows the negative logarithm of the observed and the expected p-value for each SNP. There is no evidence of population stratification, as most of the observed p-values do not deviate from the expected line (red line).

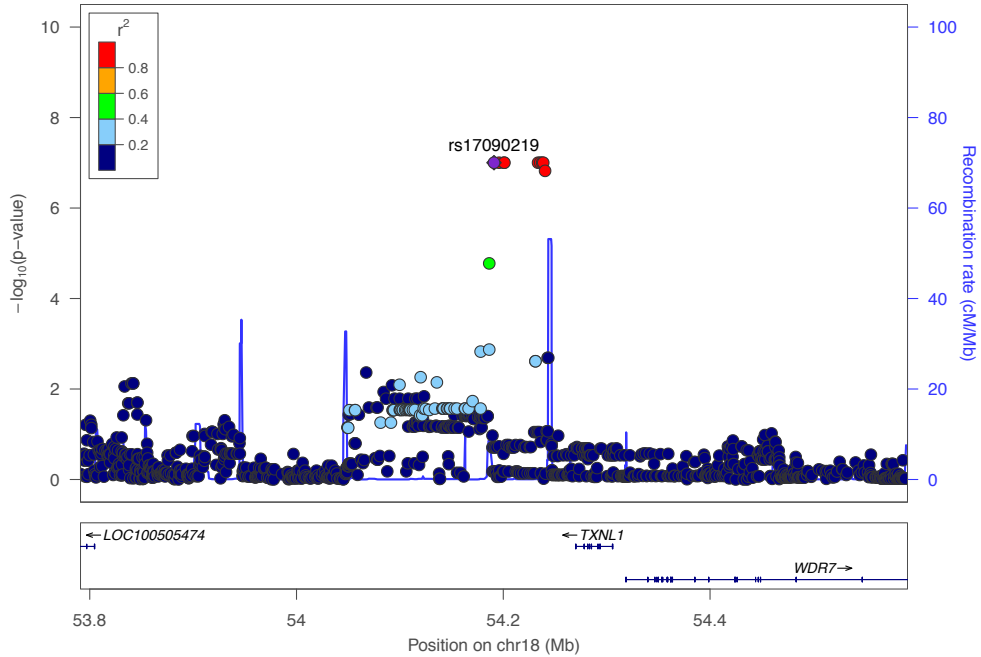

**Figure 2 A regional plot for association with cognitive decline**

The purple dot is the most significant SNP rs17090219 among SNPs in the region surrounding it within 400kb. Dots are colored according to the range  $r^2$  to show their degree of LD with rs17090219. The blue line shows the estimated recombination rate.

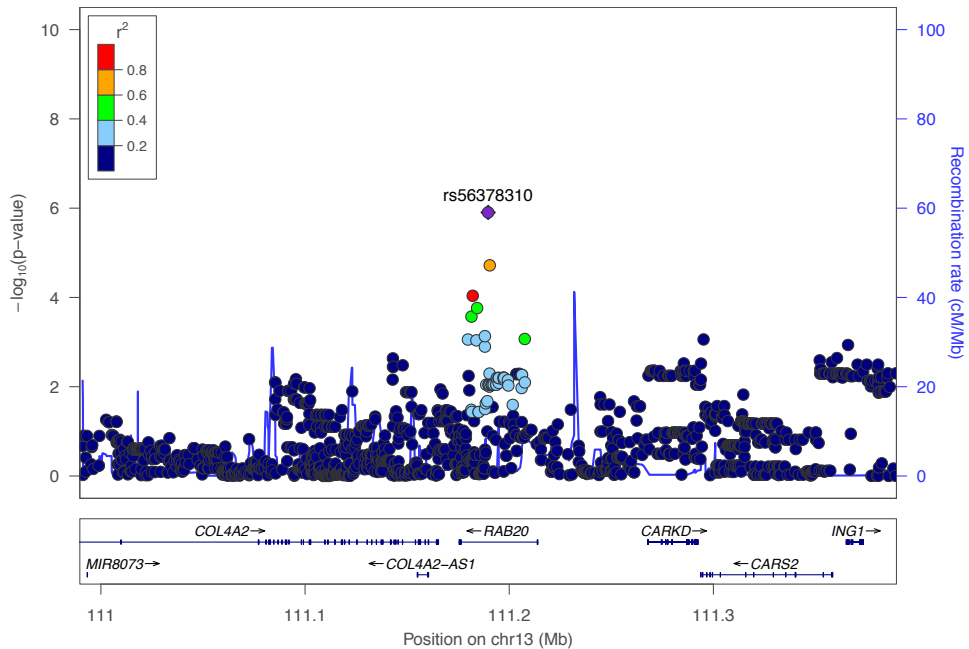

**Figure 3 A regional plot for association with cognitive decline**

The purple dot is the most significant SNP rs56378310 among SNPs in the region surrounding it within 200kb. Dots are colored according to the range  $r^2$  to show their degree of LD with rs56378310. The blue line shows the estimated recombination rate.

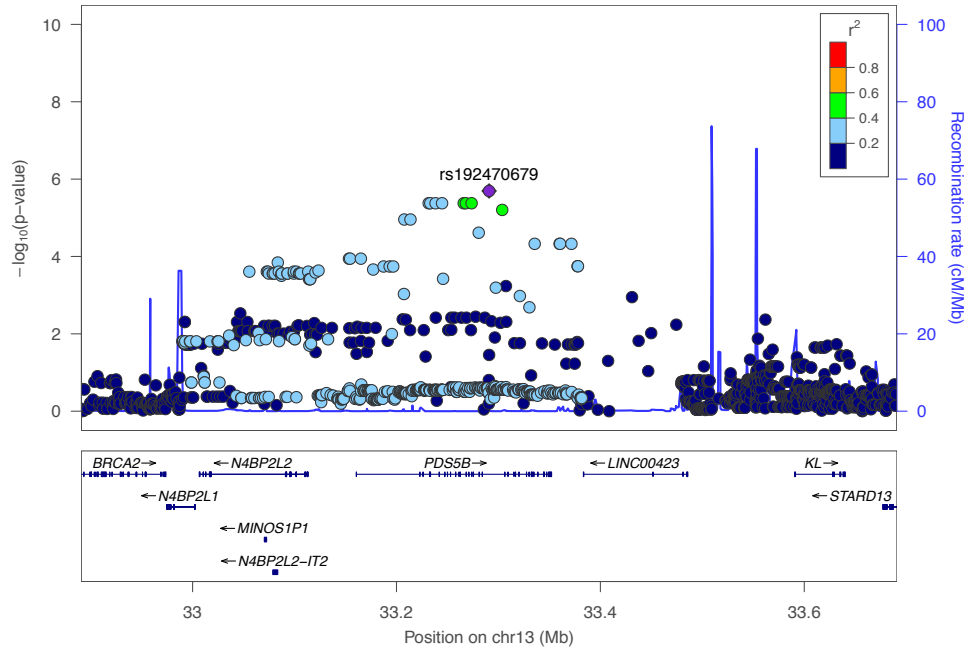

**Figure 4 A regional plot for association with cognitive decline**

The purple dot is the most significant SNP rs192470679 among SNPs in the region surrounding it within 400kb. Dots are colored according to the range  $r^2$  to show their degree of LD with rs192470679. The blue line shows the estimated recombination rate.

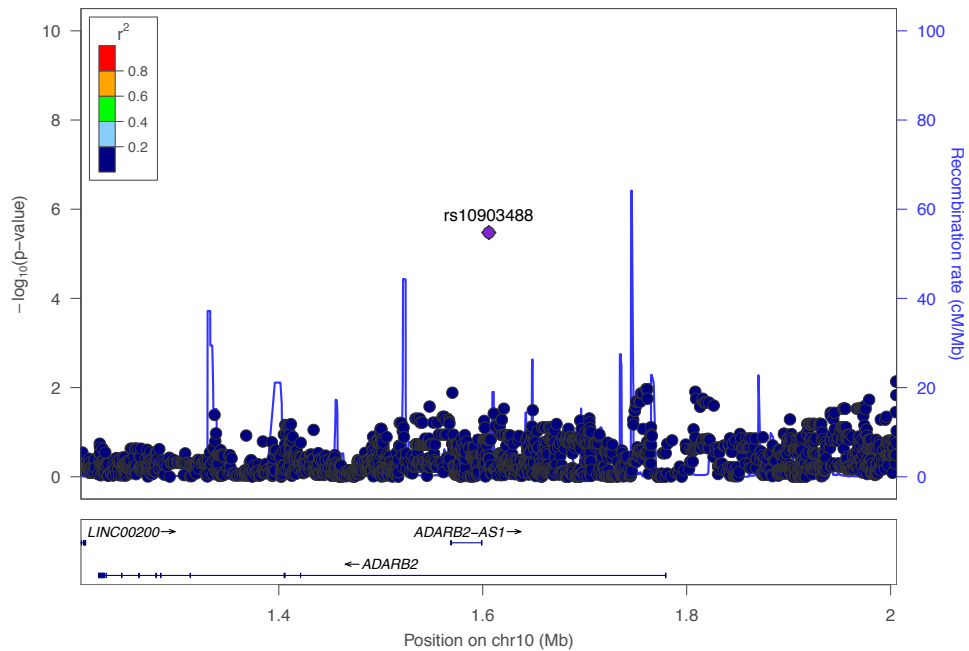

**Figure 5 A regional plot for association with cognitive decline**

The purple dot is the most significant SNP rs10903488 among SNPs in the region surrounding it within 400kb. Dots are colored according to the range  $r^2$  to show their degree of LD with rs10903488. The blue line shows the estimated recombination rate.

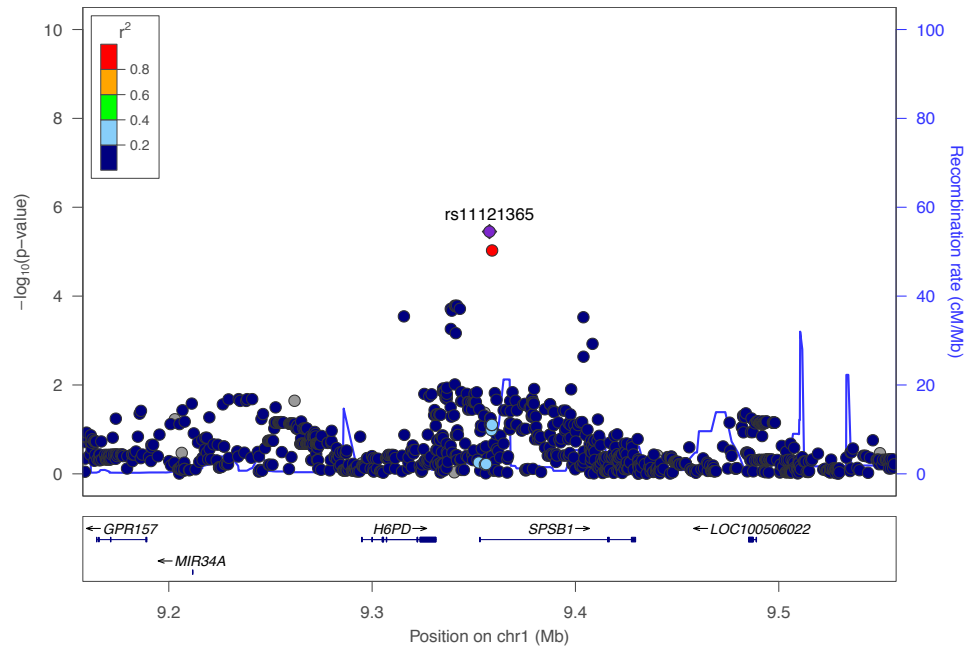

**Figure 6 A regional plot for association with cognitive decline**

The purple dot is the most significant SNP rs11121365 among SNPs in the region surrounding it within 200kb. Dots are colored according to the range  $r^2$  to show their degree of LD with rs11121365. The blue line shows the estimated recombination rate.
